# Supplementary material for: Characterization of the morphology and complete mitochondrial genomes of Eupteryx minusula and Eupteryx gracilirama (Hemiptera: Cicadellidae: Typhlocybinae) from Karst area, Southwest China
Source: PeerJ. 2021 Nov 24;9:e12501. doi: 10.7717/peerj.12501 (PMC8627127; doi:10.7717/peerj.12501)
Supplement: Supplemental Information 1 [file peerj-09-12501-s001.xlsx]

## Sheet: Sheet1
Subfamily /Tribe	Species	Accession NO.	Reference
Typhlocybinae/Empoascini	Ghauriana sinensis (Qin & Zhang, 2011)	MN699874	Shi, et al (2020)
Typhlocybinae/Empoascini	Empoasca vitis (Göthe, 1875)	KJ815009	Zhou, et al (2016)
Typhlocybinae/Empoascini	Empoasca flavescens	MK211224	Luo, et al (2019)
Typhlocybinae/Empoascini	Empoasca sp.15062818	MK251093	Song, et al (2019)
Typhlocybinae/Empoascini	Kybos pura (Stål, 1858)	MK251088	Song, et al (2019)
Typhlocybinae/Empoascini	Empoasca onukii (Matsuda, 1952)	MK251089	Song, et al (2019)
Typhlocybinae/Empoascini	Empoasca sp. C2591422	MK251111	Song, et al (2019)
Typhlocybinae/Empoascini	Empoasca sp.	MK251099	Song, et al (2019)
Typhlocybinae/ Zyginellini	Limassolla lingchuanensis (Chou & Zhang, 1985)	MN605256	Yuan, et al (2019)
Typhlocybinae/ Zyginellini	Zyginella minuta (Yang, 1965)	MT488436	Yan, et al (2020)
Typhlocybinae/Typhocybini	Bolanusoides shaanxiensis (Huang & Zhang, 2005)	MN661136	Unpublished
Typhlocybinae/Typhocybini	Typhlocyba sp. EMHAU 15062510	KY039138	Song, et al (2017)
Typhlocybinae/Typhocybini	Eupteryx (Stacla) gracilirama (Hou, Zhang & Huang, 2016)	MT594485	This study
Typhlocybinae/Typhocybini	Eupteryx (Eupteryx) minuscula (Lindberg, 1929)	MN910279	Yang, et al (2020)
Typhlocybinae/Erythroneurini	Eratoneura flexibilis (Knull, 1949)	MK251094	Song, et al (2019)
Typhlocybinae/Erythroneurini	Mitjaevia protuberanta (Song, Li & Xiong, 2011)	MN627216	Yuan, et al (2019)
Typhlocybinae/Erythroneurini	Empoascanara dwalata (Dworakowska, 1971)	MT350235	Chen, et al (2020)
Typhlocybinae/Erythroneurini	Empoascanara sipra (Dworakowska, 1980)	MN604278	Tan, et al (2020)
Typhlocybinae/Erythroneurini	Illinigina sp. EMHAU 15062817	KY039129	Song, et al (2017)
Typhlocybinae/Erythroneurini	Erythroneura vitifex (Fitch, 1856)	MK251100	Song, et al (2019)
Typhlocybinae/Erythroneurini	Zygina ordinaria (Ribaut, 1936)	MK251104	Song, et al (2019)
Outgroup	Macrosteles quadrilineatus (Forbes, 1885)	KY645960	Mao, et al (2017)
Outgroup	Japananus hyalinus (Osborn, 1900)	KY129954	Du, et al (2017)
Outgroup	Yanocephalus yanonis (Matsumura, 1902)	KY039113	Song, et al (2017)
