# Supplementary material for: Characterization of the morphology and complete mitochondrial genomes of Eupteryx minusula and Eupteryx gracilirama (Hemiptera: Cicadellidae: Typhlocybinae) from Karst area, Southwest China
Source: PeerJ. 2021 Nov 24;9:e12501. doi: 10.7717/peerj.12501 (PMC8627127; doi:10.7717/peerj.12501)
Supplement: Supplemental Information 2 [file peerj-09-12501-s002.xlsx]

## Sheet: Sheet1
Gene	Location		Size		Intergenic		Start Codon		Stop Codon		Strand
					nucleotides
	EM	EG	EM	EG	EM	EG	EM	EG	EM	EG	EM/EG
trnI	1-65	1-70	65	70							N
trnQ	63-131	68-136	69	69	-3	-3					J
trnM	131-199	136-204	69	69	-1	-1					N
nad2	200-1159	205-1182	960	978			ATA	ATA	TAA	TAG	N
trnW	1179-1244	1187-1253	66	67	19	4					N
trnC	1237-1297	1246-1306	61	61	-8	-8					J
trnY	1300-1364	1313-1378	65	66	2	6					J
cox1	1366-2901	1380-2918	1536	1539	1	1	ATG	ATG	TAA	TAA	N
trnL2	2905-2970	2914-2980	66	67	3	-5					N
cox2	2971-3649	3029-3700	679	672	0	48	ATT	ATA	T	TAA	N
trnK	3650-3721	3660-3731	72	72	0	-41					N
trnD	3722-3786	3734-3795	65	62	0	2					N
atp8	3786-3938	3796-3948	153	153	-1	0	TTG	TTG	TAA	TAA	N
atp6	3932-4582	3942-4592	651	651	-6	-7	ATG	ATG	TAA	TAA	N
cox3	4587-5375	4597-5374	789	778	4	4	ATG	ATG	TAG	T	N
trnG	5366-5425	5375-5436	60	62	-10	0					N
nad3	5428-5781	5437-5790	354	354	2	0	ATT	ATT	TAA	TAA	N
trnA	5782-5843	5796-5858	62	63	0	5					N
trnR	5847-5914	5857-5924	68	68	3	-2					N
trnN	5913-5977	5923-5987	65	65	-2	-2					N
trnS1	5977-6041	5987-6053	65	67	-1	-1					N
trnE	6048-6114	6075-6139	67	65	6	21					N
trnF	6115-6178	6141-6204	64	64	0	1					J
nad5	6179-7829	6205-7855	1651	1651			TTG	ATT	T	T	J
trnH	7850-7911	7874-7937	62	64	20	18					J
nad4	7911-9230	7937-9256	1320	1320	-1	-1	ATG	ATG	TAA	TAA	J
nad4L	9224-9499	9250-9525	276	276	-6	-7	ATG	ATG	TAA	TAA	J
trnT	9502-9568	9528-9592	67	65	2	2					N
trnP	9569-9634	9593-9658	66	66							J
nad6	9637-10131	9661-10155	495	495	2	2	ATT	ATA	TAA	TAA	N
cytb	10124-11260	10148-11284	1137	1137	8	-8	ATG	ATG	TAG	TAA	N
trnS2	11259-11323	11287-11351	65	65	-2	2					N
nad1	11324-12256	11351-12283	933	933	0	-1	ATT	ATT	TAA	TAA	J
trnL1	12257-12322	12284-12354	66	71							J
rrnL	12323-13483	12355-13519	1161	1165							J
trnV	13484-13549	13520-13584	66	65							J
rrnS	13550-14283	13585-14321	734	737							J
AT-rich region	14284-16945	14322-17173	2662	2852
