# Supplementary material for: Characterization of the morphology and complete mitochondrial genomes of Eupteryx minusula and Eupteryx gracilirama (Hemiptera: Cicadellidae: Typhlocybinae) from Karst area, Southwest China
Source: PeerJ. 2021 Nov 24;9:e12501. doi: 10.7717/peerj.12501 (PMC8627127; doi:10.7717/peerj.12501)
Supplement: Supplemental Information 3 [file peerj-09-12501-s003.xlsx]

## Sheet: Sheet1
Region	A(%)		T(%)		G(%)		C(%)		AT(%)		GC(%)		AT skew		GC skew
	EM	EG	EM	EG	EM	EG	EM	EG	EM	EG	EM	EG	EM	EG	EM	EG
Whole	43.6	44.8	35.2	35.6	9.8	8.4	11.4	11.1	78.8	80.4	21.2	19.5	0.107	0.114	-0.075	-0.138
PCGs	42.6	44.2	33.5	34.1	12.8	9.3	11.1	12.4	76.1	78.3	23.9	21.7	0.12	0.129	0.071	-0.143
tRNA	41.4	42.9	37.1	37.3	9.8	8.7	11.7	11.1	78.5	81.2	21.5	19.8	0.055	0.7	-0.088	-0.121
rRNA	47.1	47.8	35.4	35.9	6.8	6	10.7	10.3	82.5	83.7	17.5	16.3	0.142	0.142	-0.223	-0.264
CR	46.5	47.9	40.5	401	7.2	4.8	5.8	7.2	87	88	13	12	0.069	0.089	0.108	-0.2
